# Supplementary material
Source: publisher figshare collection journal article supplement (https://acs.figshare.com/ndownloader/files/4577686)
Supplement: Supplementary file 1 [file 4577686]

*Supporting Information for*

**Syntheses, Structures and Properties of Tricarbonyl (chloro)  
Rhenium(I) Complexes with Redox-Active  
Tetrathiafulvalene-Pyrazole Ligands**

Wei Liu,<sup>†</sup> Jing Xiong,<sup>†</sup> Yong Wang,<sup>‡</sup> Xin-Hui Zhou,<sup>†</sup> Ru Wang,<sup>†</sup> Jing-Lin Zuo,<sup>\*†</sup> and  
Xiao-Zeng You<sup>†</sup>

*State Key Laboratory of Coordination Chemistry, Nanjing National Laboratory of  
Microstructures, School of Chemistry and Chemical Engineering, Nanjing  
University, Nanjing 210093, P. R. China.*

*Institute of Theoretical and Computational Chemistry, School of Chemistry and  
Chemical Engineering, Nanjing University, Nanjing, 210093, P. R. China*

**Table S1. Main experimental and calculated optical transitions for 5a–d and their corresponding oxidized states.**

|                         | Orbital Excitations <sup>a</sup>                                                    | Character                      | Calcd/nm | $f^b$  | Exptl/nm |
|-------------------------|-------------------------------------------------------------------------------------|--------------------------------|----------|--------|----------|
| <b>5a</b>               | 279→283                                                                             | ICT                            | 388      | 0.0336 | 333      |
|                         | 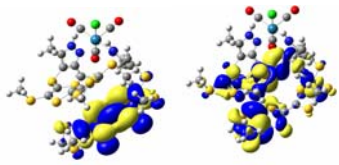   |                                |          |        |          |
|                         | 278→282                                                                             | $\pi \rightarrow \pi^*$        | 375      | 0.0426 |          |
|                         |    |                                |          |        |          |
| <b>5a<sup>•+</sup></b>  | 274 $\beta$ →279 $\beta$                                                            | $\pi \rightarrow \pi^*$        | 923      | 0.0788 | 823      |
|                         |    |                                |          |        |          |
|                         | 273 $\beta$ →279 $\beta$                                                            | ICT                            | 829      | 0.0627 |          |
|                         |  |                                |          |        |          |
| <b>5a<sup>2+</sup></b>  | 274→279                                                                             | ICT<br>$\pi \rightarrow \pi^*$ | 926      | 0.1929 | 822      |
|                         |  |                                |          |        |          |
|                         | 273→279                                                                             | $\pi \rightarrow \pi^*$        | 922      | 0.1160 |          |
|                         |  |                                |          |        |          |
| <b>5a<sup>•3+</sup></b> | 270 $\alpha$ →279 $\alpha$                                                          | $\pi \rightarrow \pi^*$        | 1060     | 0.0292 | 822      |
|                         |  |                                |          |        |          |
| <b>5a<sup>4+</sup></b>  | 273→278                                                                             | $\pi \rightarrow \pi^*$        | 882      | 0.3561 | 821      |
|                         |  |                                |          |        |          |

<sup>a</sup> The molecular orbital No. involved in each transition; <sup>b</sup> Oscillator strength.

|                         | Orbital Excitations                                                                 | Character                      | Calcd<br>/nm | $f^b$  | Exptl<br>/nm |
|-------------------------|-------------------------------------------------------------------------------------|--------------------------------|--------------|--------|--------------|
| <b>5b</b>               | 256→261                                                                             | $\pi \rightarrow \pi^*$        | 357          | 0.0337 | 358(sh)      |
|                         | 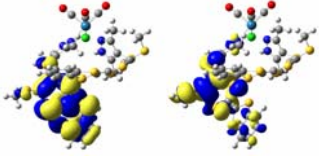   |                                |              |        |              |
|                         | 257→260                                                                             | $\pi \rightarrow \pi^*$        | 367          | 0.0349 |              |
|                         |    |                                |              |        |              |
| <b>5b<sup>•+</sup></b>  | 251 $\beta$ →257 $\beta$                                                            | ICT                            | 800          | 0.0986 | 776          |
|                         |    |                                |              |        |              |
|                         | 252 $\beta$ →257 $\beta$                                                            | $\pi \rightarrow \pi^*$        | 804          | 0.0451 |              |
|                         |   |                                |              |        |              |
| <b>5b<sup>2+</sup></b>  | 252→257                                                                             | ICT<br>$\pi \rightarrow \pi^*$ | 835          | 0.2012 | 768          |
|                         |  |                                |              |        |              |
|                         | 251→257                                                                             | ICT<br>$\pi \rightarrow \pi^*$ | 877          | 0.1344 |              |
|                         |  |                                |              |        |              |
| <b>5b<sup>•3+</sup></b> | 252 $\alpha$ →257 $\alpha$                                                          | $\pi \rightarrow \pi^*$        | 1015         | 0.0124 | 765          |
|                         |  |                                |              |        |              |
| <b>5b<sup>4+</sup></b>  | 251→257                                                                             | $\pi \rightarrow \pi^*$        | 821          | 0.0053 | 777          |
|                         |  |                                |              |        |              |

<sup>a</sup> The molecular orbital No. involved in each transition; <sup>b</sup> Oscillator strength.

|                         | Orbital Excitations                                                                                                                                                                                                                | Character                                                            | Calcd<br>/nm    | $f^b$  | Exptl<br>/nm |
|-------------------------|------------------------------------------------------------------------------------------------------------------------------------------------------------------------------------------------------------------------------------|----------------------------------------------------------------------|-----------------|--------|--------------|
| <b>5c</b>               | 276→281<br>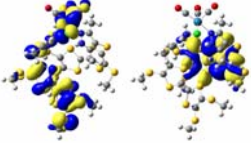                                                                                                                                       | ICT                                                                  | 355             | 0.0295 | 343          |
| <b>5c<sup>•+</sup></b>  | 271 $\beta$ →277 $\beta$<br>                                                                                                                      | ICT                                                                  | 968             | 0.0842 | 906          |
| <b>5c<sup>2+</sup></b>  | 271→277<br><br>272→277<br>                                     | ICT<br>$\pi \rightarrow \pi^*$<br><br>ICT<br>$\pi \rightarrow \pi^*$ | 985<br><br>1011 | 0.1924 | 909          |
| <b>5c<sup>•3+</sup></b> | 274 $\beta$ →277 $\beta$<br><br>275 $\beta$ →276 $\beta$<br> | $\pi \rightarrow \pi^*$<br><br>$\pi \rightarrow \pi^*$               | 937<br><br>954  | 0.0544 | 909          |
| <b>5c<sup>4+</sup></b>  | 271→277<br>                                                                                                                                     | ICT                                                                  | 893             | 0.1683 | 903          |

<sup>a</sup> The molecular orbital No. involved in each transition; <sup>b</sup> Oscillator strength.

|                         | Orbital Excitations                                                                 | Character                      | Calcd<br>/nm | $f^b$  | Exptl<br>/nm |
|-------------------------|-------------------------------------------------------------------------------------|--------------------------------|--------------|--------|--------------|
| <b>5d</b>               | 285→289                                                                             | $\pi \rightarrow \pi^*$        | 388          | 0.0367 | 337<br>392   |
|                         | 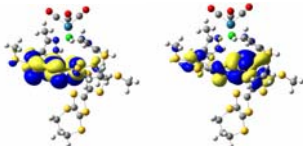   |                                |              |        |              |
|                         | 284→287                                                                             | $\pi \rightarrow \pi^*$        | 392          | 0.0242 |              |
|                         |    |                                |              |        |              |
| <b>5d<sup>•+</sup></b>  | 279 $\beta$ →285 $\beta$                                                            | ICT                            | 852          | 0.0875 | 815          |
|                         |    |                                |              |        |              |
|                         | 280 $\beta$ →285 $\beta$                                                            | $\pi \rightarrow \pi^*$        | 903          | 0.0587 |              |
|                         |  |                                |              |        |              |
| <b>5d<sup>2+</sup></b>  | 279→285                                                                             | ICT<br>$\pi \rightarrow \pi^*$ | 929          | 0.1303 | 813          |
|                         |  |                                |              |        |              |
|                         | 280→285                                                                             | ICT<br>$\pi \rightarrow \pi^*$ | 936          | 0.2113 |              |
|                         |  |                                |              |        |              |
| <b>5d<sup>•3+</sup></b> | 283 $\beta$ →285 $\beta$                                                            | $\pi \rightarrow \pi^*$        | 881          | 0.1647 | 812          |
|                         |  |                                |              |        |              |
| <b>5d<sup>4+</sup></b>  | 279→285                                                                             | ICT                            | 892          | 0.0015 | 814          |
|                         |  |                                |              |        |              |

<sup>a</sup> The molecular orbital No. involved in each transition; <sup>b</sup> Oscillator strength.

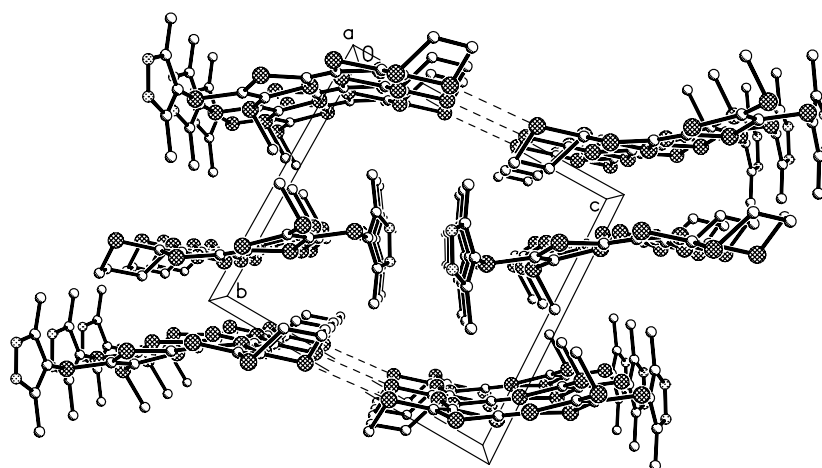

**Figure S1.** The packing diagram of compound **4d** view along the *a* axis (the dotted line representing the S...S non-bonded contacts less than 3.7 Å).

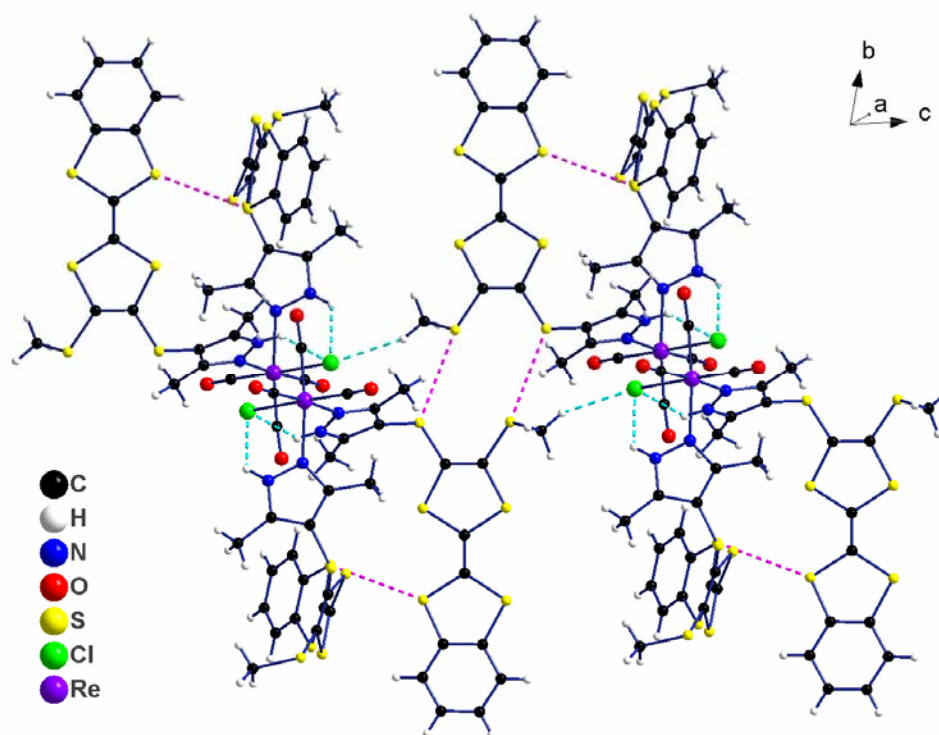

**Figure S2.** The packing diagram of compound **5b**. The dotted line representing the S...S non-bonded contacts (red) less than 3.7 Å and the H-bonding (blue).



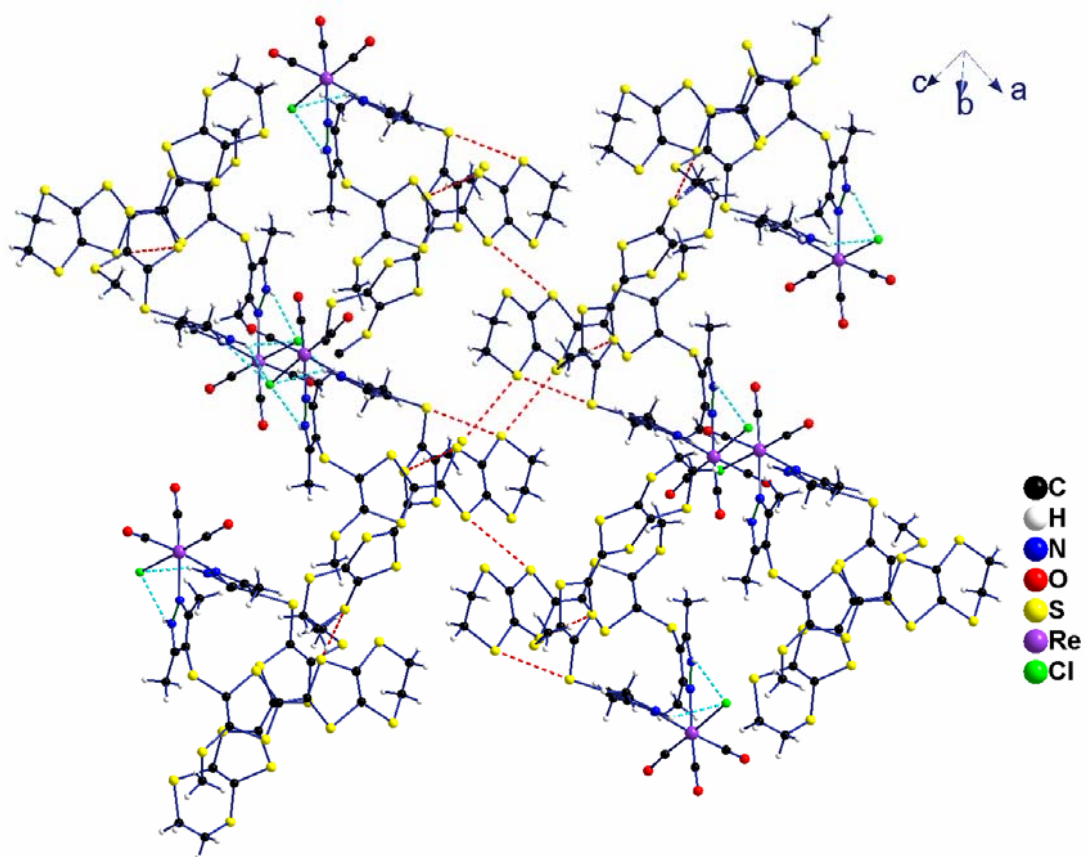

**Figure S3.** The packing diagram of compound **5c**. The dotted line representing the S...S non-bonded contacts (red) less than 3.7 Å and the H-bonding (blue).

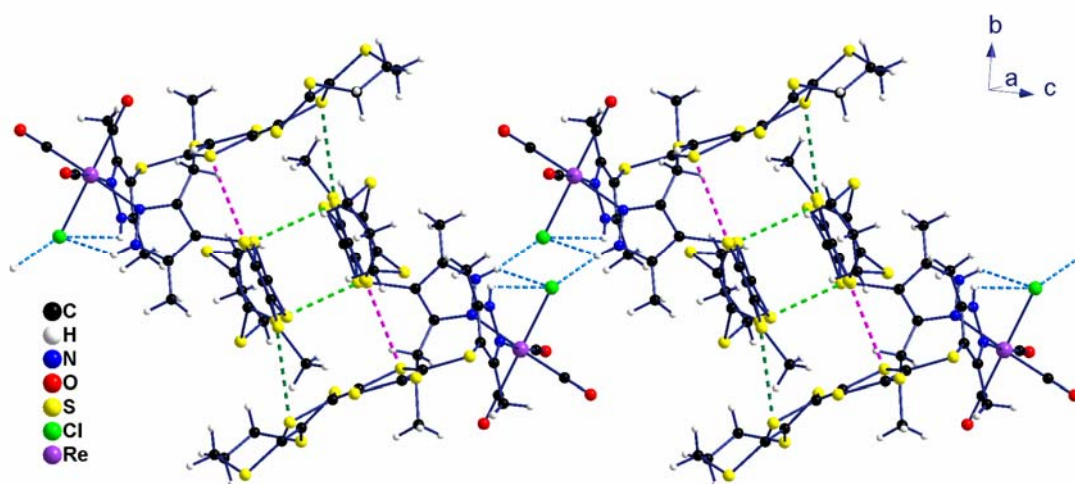

**Figure S4.** The packing diagram of compound **5d**. The dotted line representing the S...S non-bonded contacts (red and green) less than 3.7 Å and the H-bonding (blue).

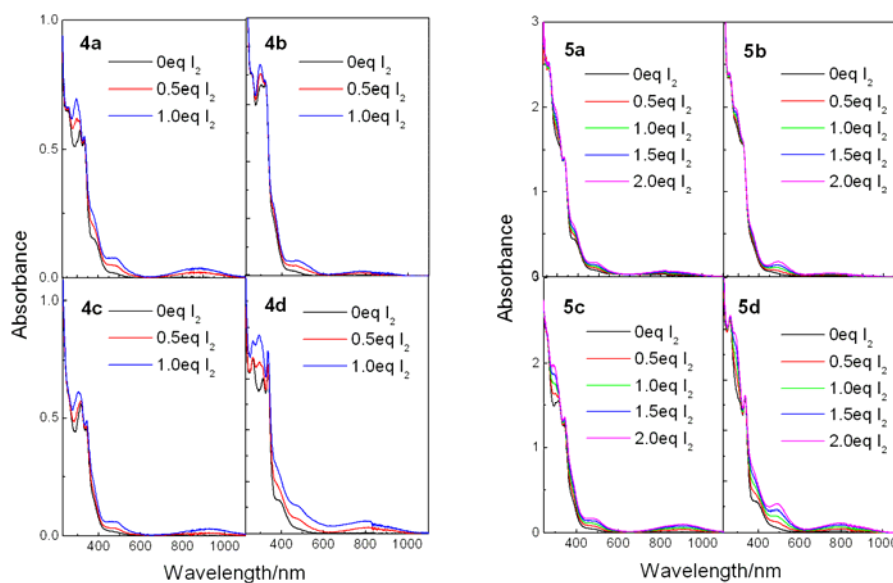

**Figure S5.** UV-vis absorption spectra for **4a–d** ( $4 \times 10^{-5}$  M) and **5a–d** ( $4 \times 10^{-5}$  M), in the presence of varying amounts of  $I_2$ , measured in  $CH_2Cl_2$ .

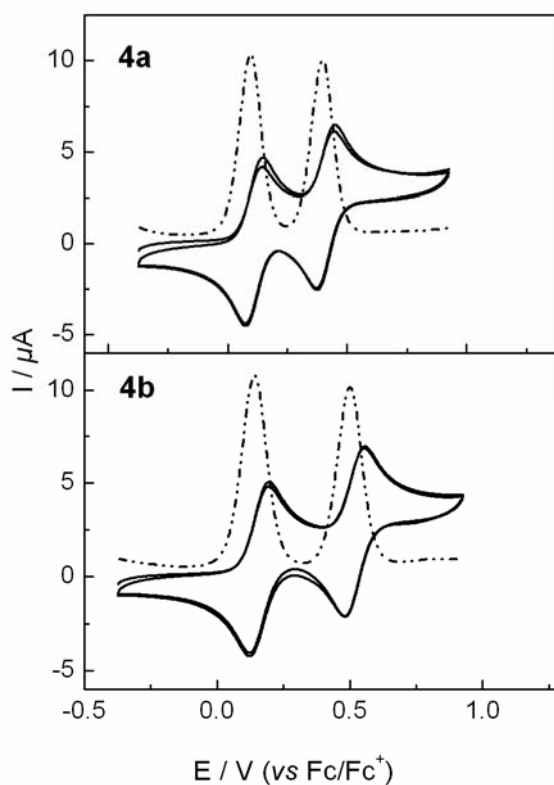

**Figure S6.** Cyclic voltammogram (solid line) and differential pulse voltammogram (dash-dotted line) for compounds **4a** and **4b** ( $10^{-3}$  M), measured in  $CH_2Cl_2$  (vs  $Fc/Fc^+$ ). The scan rate for CV measurements was 50 mV/s; the step increment and pulse width for DPV measurements were 4 mV and 0.05s, respectively.



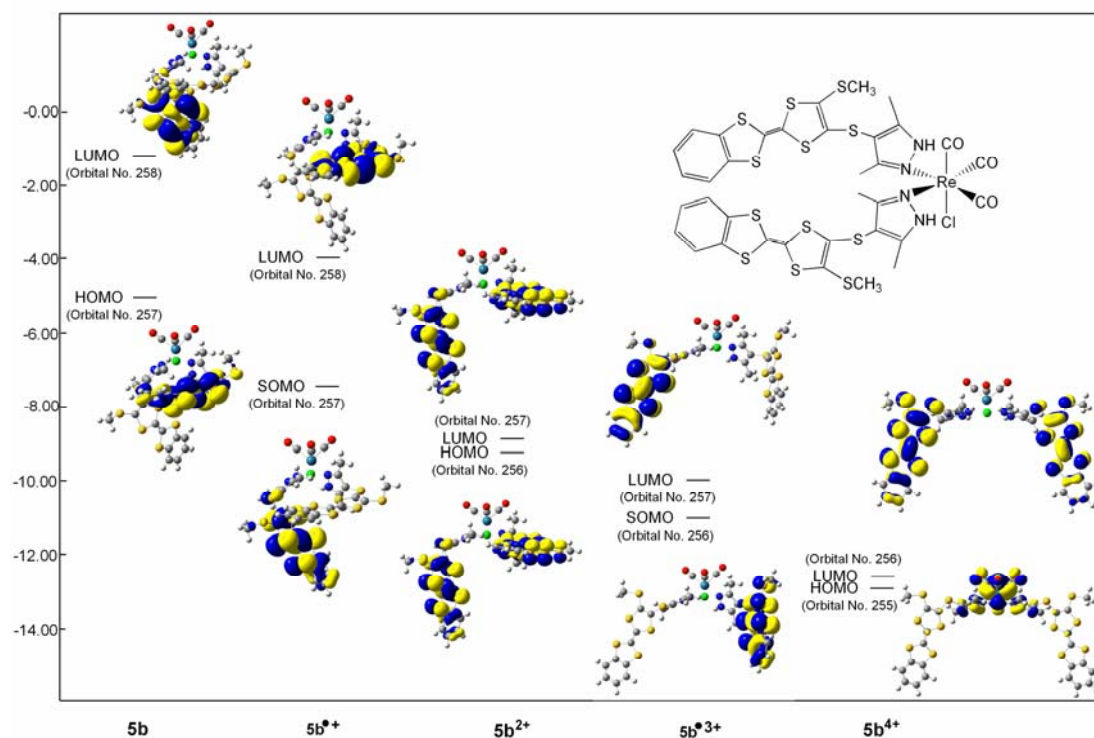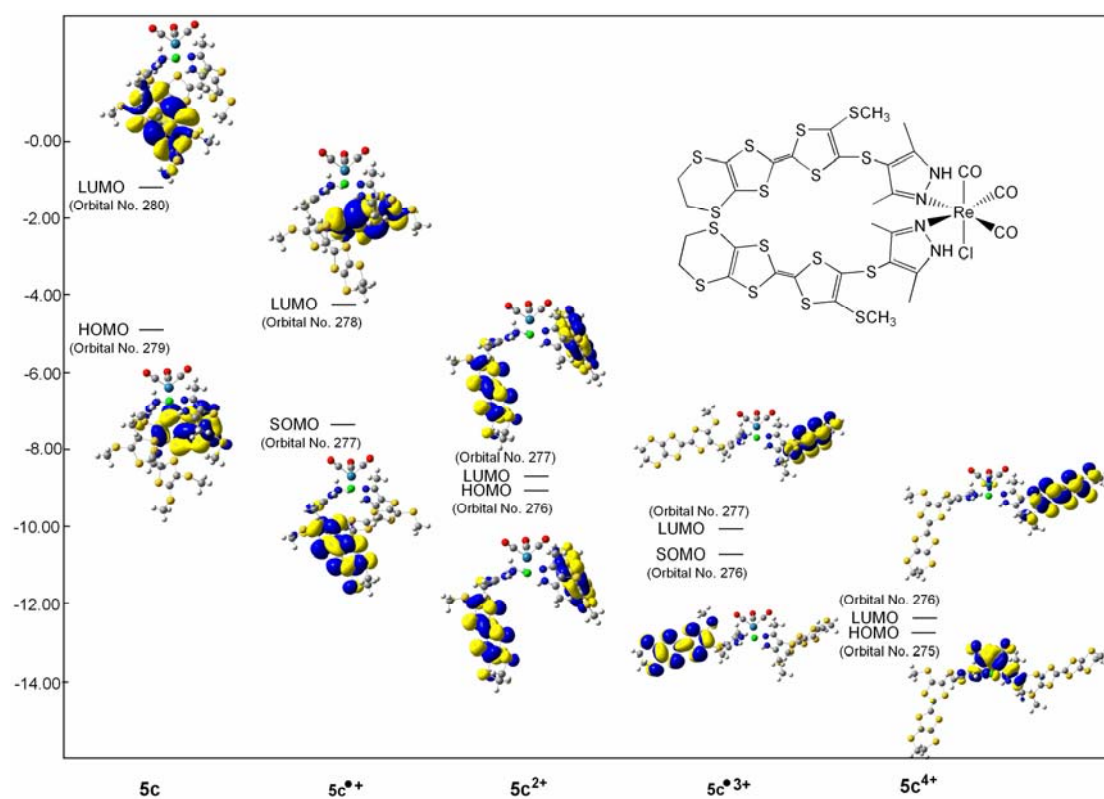

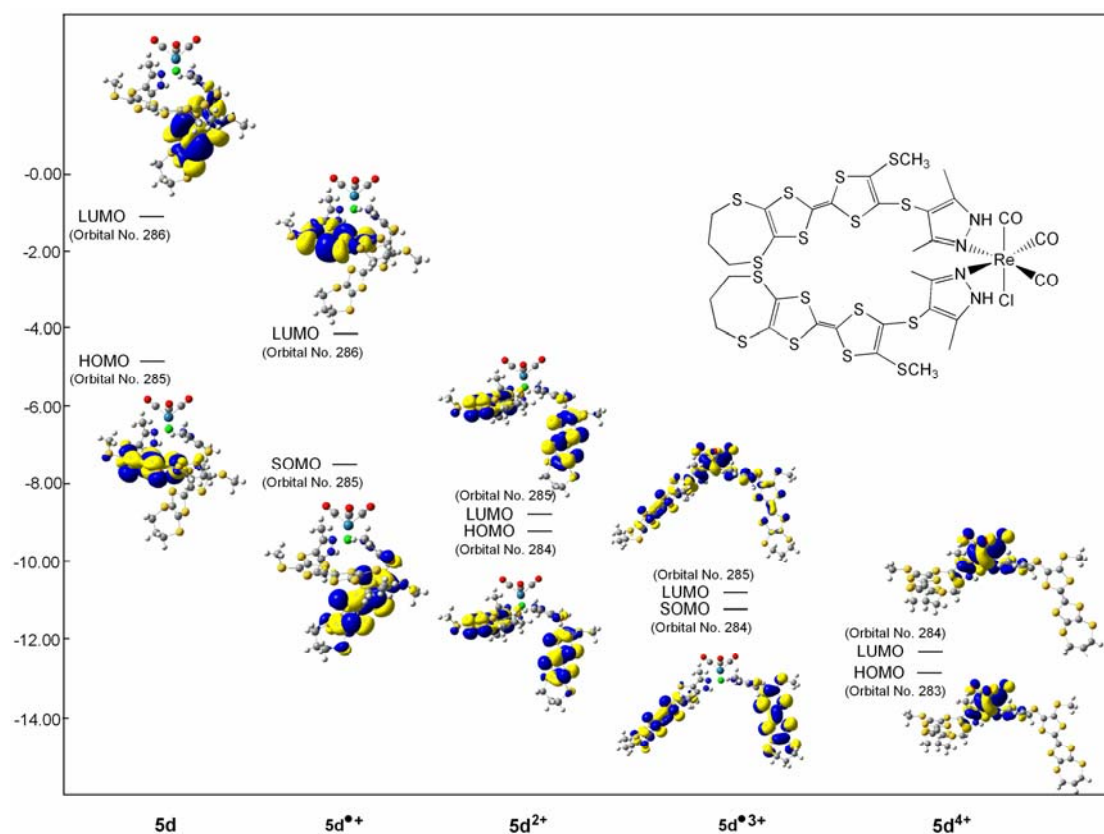

**Figure S7.** Frontier orbitals for complexes **5b–d** in the neutral, radical cation, dication, trication and tetracation states.
